# Supplementary material for: Direct synthesis of phenol by novel [FeFe]-hydrogenase model complexes as catalysts of benzene hydroxylation with H2O2
Source: Royal Society of Chemistry journal article supplement (doi:10.1039/c6ra27831k), 2017-01-01
Supplement: c6ra27831k1.pdf [file c6ra27831k1.pdf]

Electronic supplementary information

**Direct synthesis of phenol by novel [FeFe]-hydrogenase  
model complexes as catalysts of benzene hydroxylation with  
 $H_2O_2$**

**Xia Zhang<sup>a,b,c</sup>, Tianyong Zhang<sup>a,b,c,\*</sup>, Bin Li<sup>a,b,c\*</sup>, Guanghui Zhang<sup>a</sup>, Li Hai<sup>a</sup>,  
Xiaoyuan Ma<sup>a</sup>, Wubin Wu<sup>a</sup>**

<sup>a</sup> *Tianjin Key Laboratory of Applied Catalysis Science and Technology, School of Chemical Engineering and Technology, Tianjin University, Tianjin 300354, China;*

<sup>b</sup> *Collaborative Innovation Center of Chemical Science and Engineering, Tianjin 300354, China;*

<sup>c</sup> *Tianjin Engineering Research Center of Functional Fine Chemicals, Tianjin 300354, China*

**Table of Contents**

1 **Table S1** Selected bond lengths (Å) and bond angles(°) for complexes **1-3**

2 **Table S2** Crystallographic data and refinement parameters for complexes **1-3**

3 **Table S3** Catalytic hydroxylation of benzene to phenol with different oxidants in the presence of complex **1**.<sup>[a]</sup>

**Table S1** Selected bond lengths (Å) and bond angles(°) for complexes **1-3**

| Complex          | <b>1</b>   | <b>2</b>    | <b>3</b>   |
|------------------|------------|-------------|------------|
| Fe(1)-Fe(2)      | 2.5054(7)  | 2.5090(4)   | 2.5126(11) |
| Fe(1)-S(1)       | 2.2481(10) | 2.2669(5)   | 2.2629(19) |
| Fe(1)-S(2)       | 2.2213(10) | 2.2700(5)   | 2.225(2)   |
| Fe(2)-S(1)       | 2.2457(9)  | 2.2792(5)   | 2.304(2)   |
| Fe(2)-S(2)       | 2.2571(10) | 2.2514(5)   | 2.2510(19) |
| Fe(1)-P(1)       |            | 2.2734(5)   | 2.2447(15) |
| S(1)-Fe(1)-Fe(2) | 56.07(3)   | 56.739(13)  | 57.42(6)   |
| S(1)-Fe(2)-Fe(1) | 56.16(3)   | 56.268(14)  | 55.84(5)   |
| S(2)-Fe(1)-Fe(2) | 56.66(3)   | 55.943(12)  | 56.34(6)   |
| S(2)-Fe(2)-Fe(1) | 55.31(3)   | 56.650(14)  | 55.36(6)   |
| P(1)-Fe(1)-Fe(2) |            | 158.008(15) | 154.76(5)  |

**Table S2** Crystallographic data and refinement parameters for complexes **1-3**

|                                       | <b>1</b>                                                                     | <b>2</b>                                                                       | <b>3</b>                                                                       |
|---------------------------------------|------------------------------------------------------------------------------|--------------------------------------------------------------------------------|--------------------------------------------------------------------------------|
| Empirical formula                     | C <sub>10</sub> H <sub>8</sub> Fe <sub>2</sub> O <sub>6</sub> S <sub>2</sub> | C <sub>27</sub> H <sub>41</sub> Fe <sub>2</sub> O <sub>5</sub> PS <sub>2</sub> | C <sub>27</sub> H <sub>23</sub> Fe <sub>2</sub> O <sub>5</sub> PS <sub>2</sub> |
| Formula weight                        | 399.98                                                                       | 652.39                                                                         | 634.24                                                                         |
| Space group                           | P-1                                                                          | P2(1)/n                                                                        | P-1                                                                            |
| T (K)                                 | 113(2)K                                                                      | 113(2)K                                                                        | 113(2) K                                                                       |
| Wavelength (Å)                        | 0.71073                                                                      | 0.71073                                                                        | 0.71073                                                                        |
| Crystal size (mm)                     | 0.20 x 0.18 x 0.12                                                           | 0.20 x 0.18 x 0.12                                                             | 0.20 x 0.12 x 0.11                                                             |
| Crystal system                        | Triclinic                                                                    | Monoclinic                                                                     | Triclinic                                                                      |
| <i>a</i> (Å)                          | 9.4793(11)                                                                   | 13.8434(14)                                                                    | 9.846(2)                                                                       |
| <i>b</i> (Å)                          | 11.1920(11)                                                                  | 12.6809(14)                                                                    | 11.197(2)                                                                      |
| <i>c</i> (Å)                          | 15.6287(15)                                                                  | 17.600(2)                                                                      | 13.562(2)                                                                      |
| $\alpha$ (°)                          | 91.4370(10)                                                                  | 90                                                                             | 96.013(3)                                                                      |
| $\beta$ (°)                           | 101.320(2)                                                                   | 102.580                                                                        | 93.089(4)                                                                      |
| $\gamma$ (°)                          | 113.660(2)                                                                   | 90                                                                             | 111.076(5)                                                                     |
| V (Å <sup>3</sup> )                   | 1479.2(3)                                                                    | 3015.4(6)                                                                      | 1380.8(5)                                                                      |
| <i>Z</i>                              | 4                                                                            | 4                                                                              | 2                                                                              |
| $\rho$ (g/cm <sup>3</sup> )           | 1.796                                                                        | 1.437                                                                          | 1.525                                                                          |
| $\theta$ range (°)                    | 3.01-27.52                                                                   | 3.02 - 27.53                                                                   | 3.04-25.02                                                                     |
| $\mu$ (mm <sup>-1</sup> )             | 2.260                                                                        | 1.188                                                                          | 1.295                                                                          |
| F(000)                                | 800                                                                          | 1368                                                                           | 648                                                                            |
| goodness-of-fit on F <sup>2</sup>     | 1.018                                                                        | 1.057                                                                          | 1.076                                                                          |
| <i>R</i> [ <i>I</i> ≥ 2σ( <i>I</i> )] | 0.0450, wR2 = 0.1063                                                         | 0.0286, wR2 = 0.0715                                                           | 0.0618, wR2 = 0.1701                                                           |
| <i>R</i> (all data)                   | 0.0482, wR2 = 0.1083                                                         | 0.0298, wR2 = 0.0722                                                           | 0.0642, wR2 = 0.1749                                                           |

**Table S3** Catalytic hydroxylation of benzene to phenol with different oxidants in the presence of complex **1**. <sup>[a]</sup>

| Entry | Oxidant                       | Yield [%] | Selectivity <sup>[b]</sup> [%] |
|-------|-------------------------------|-----------|--------------------------------|
| 1     | <i>m</i> -CPBA                | 4.2       | 94                             |
| 2     | O <sub>2</sub>                | 0         | 0                              |
| 3     | H <sub>2</sub> O <sub>2</sub> | 12.6      | 85                             |
| 4     | PhIO                          | 0         | 0                              |

[a] **1**, 30  $\mu$ mol; 60 °C; benzene, 0.1 mL; CH<sub>3</sub>CN, 2.0 mL; oxidants, 5.0 mmol; reaction time, 3 h. [b] Selectivity: yield of phenol/benzene conversion.
